# Supplementary material
Source: PubMed Central journal article supplement (PMC7891207)
Supplement: Supp_Fig1-Table1.pdf [file Supp_Fig1-Table1.pdf]

## Supplementary Data

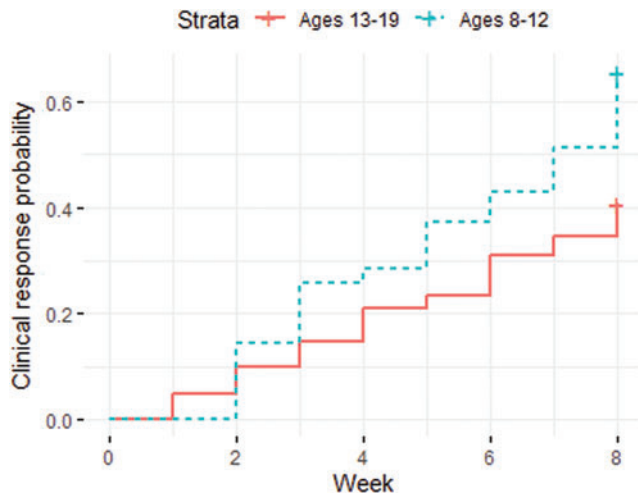

**SUPPLEMENTARY FIG. S1.** Response time by age group.

**SUPPLEMENTARY TABLE S1. SENSITIVITY, SPECIFICITY, AND POSITIVE PREDICTIVE VALUE DEFINITIONS**

|                                                               |               |                                                  | <i>Nonresponder status at week 8</i> |                       |
|---------------------------------------------------------------|---------------|--------------------------------------------------|--------------------------------------|-----------------------|
|                                                               |               |                                                  | <i>Disease present</i>               | <i>Disease absent</i> |
|                                                               |               |                                                  | <i>Nonresponder</i>                  | <i>Responder</i>      |
| No change at given week indicating that nonresponse is likely | Test positive | CGI-I ( $\geq 4$ ), no symptom improvement       | TP                                   | FP                    |
|                                                               | Test negative | CGI-I ( $\leq 3$ ), at least minimal improvement | FN                                   | TN                    |

TP, true positives; FP, false positives; FN, false negatives; TN, true negatives. Sensitivity =  $TP / (TP + FN)$ , Specificity =  $TN / (TN + FP)$ , positive predictive value =  $TP / (TP + FP)$ .
